# Supplementary material for: A Pharmacokinetics‐Informed Approach to Navigating Hydroxychloroquine Shortages in Patients With Rheumatic Disease During the COVID‐19 Pandemic
Source: PubMed Central journal article supplement — ACR Open Rheumatol. 2020 Jul 29;2(8):491–5. doi: 10.1002/acr2.11164 (PMC7437131; doi:10.1002/acr2.11164), 2020-07-29
Supplement: ACR2-2-491-s001.pdf [file ACR2-2-491-s001.pdf]

### Scenario 1: 400 mg/day for 10 days

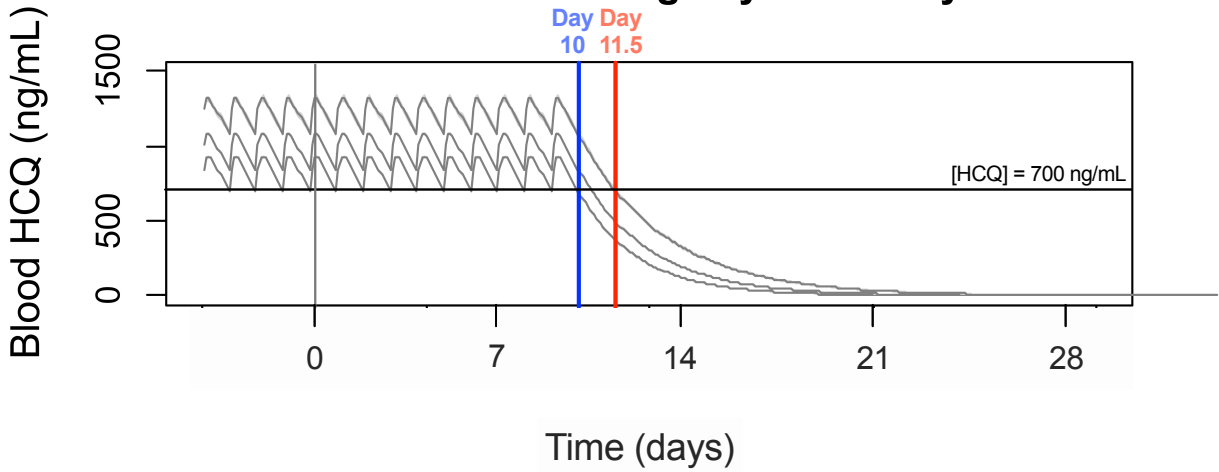

### Scenario 2: 400 mg / 200 dieb. alt. for 14 days

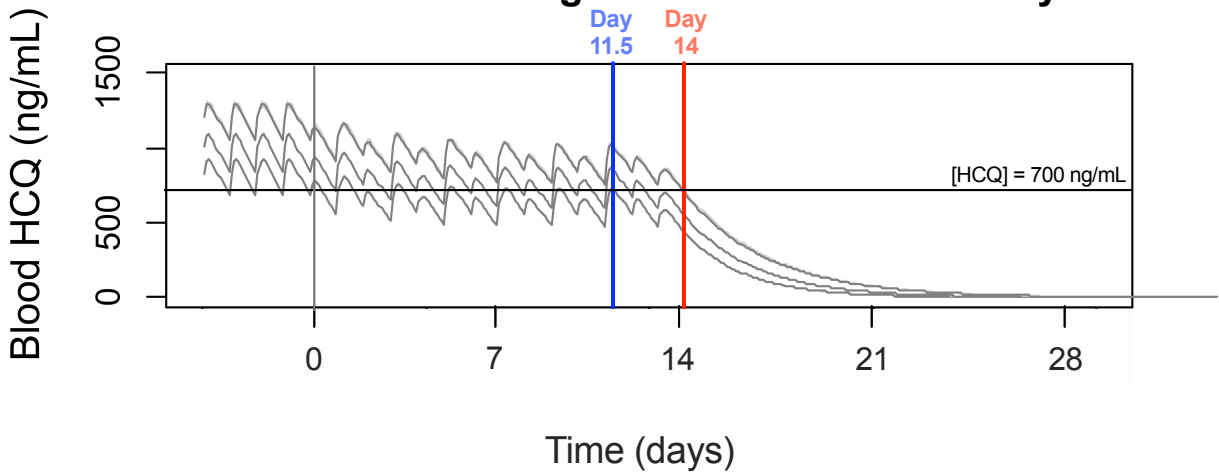

### Scenario 3: 200 mg/day for 20 days

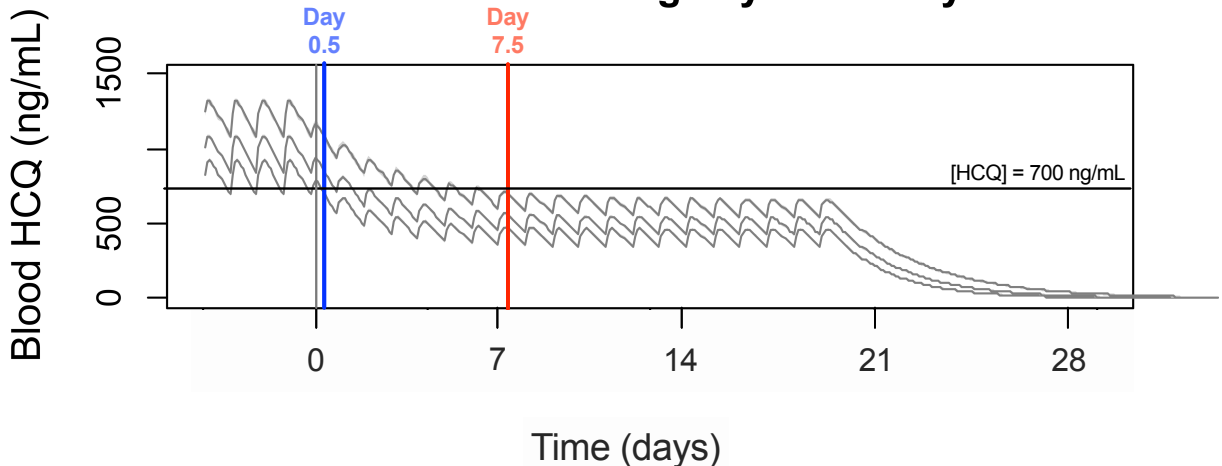

**Supplemental Figure 1.** The pharmacokinetic modeling of the 5<sup>th</sup> (bottom line), 50<sup>th</sup> (middle line), and 95<sup>th</sup> (top line) estimated baseline HCQ concentrations for low, mean, and high baseline HCQ concentrations for those taking 400 mg/day prior to day zero. These are obtained from the simulations shown on Figure 2B (scenario 1), Figure 2C (scenario 2), and Figure 2D (scenario 3). Vertical lines in blue indicate the time point when the low baseline blood concentrations consistently are < 700 ng/mL, whereas the red lines the same for the high baseline blood concentrations.
